# Supplementary material
Source: PubMed Central journal article supplement (PMC3877809)
Supplement: supp_tpc.113.117010_tpc117010Supplemental_Rev.pdf [file supp_tpc.113.117010_tpc117010Supplemental_Rev.pdf]

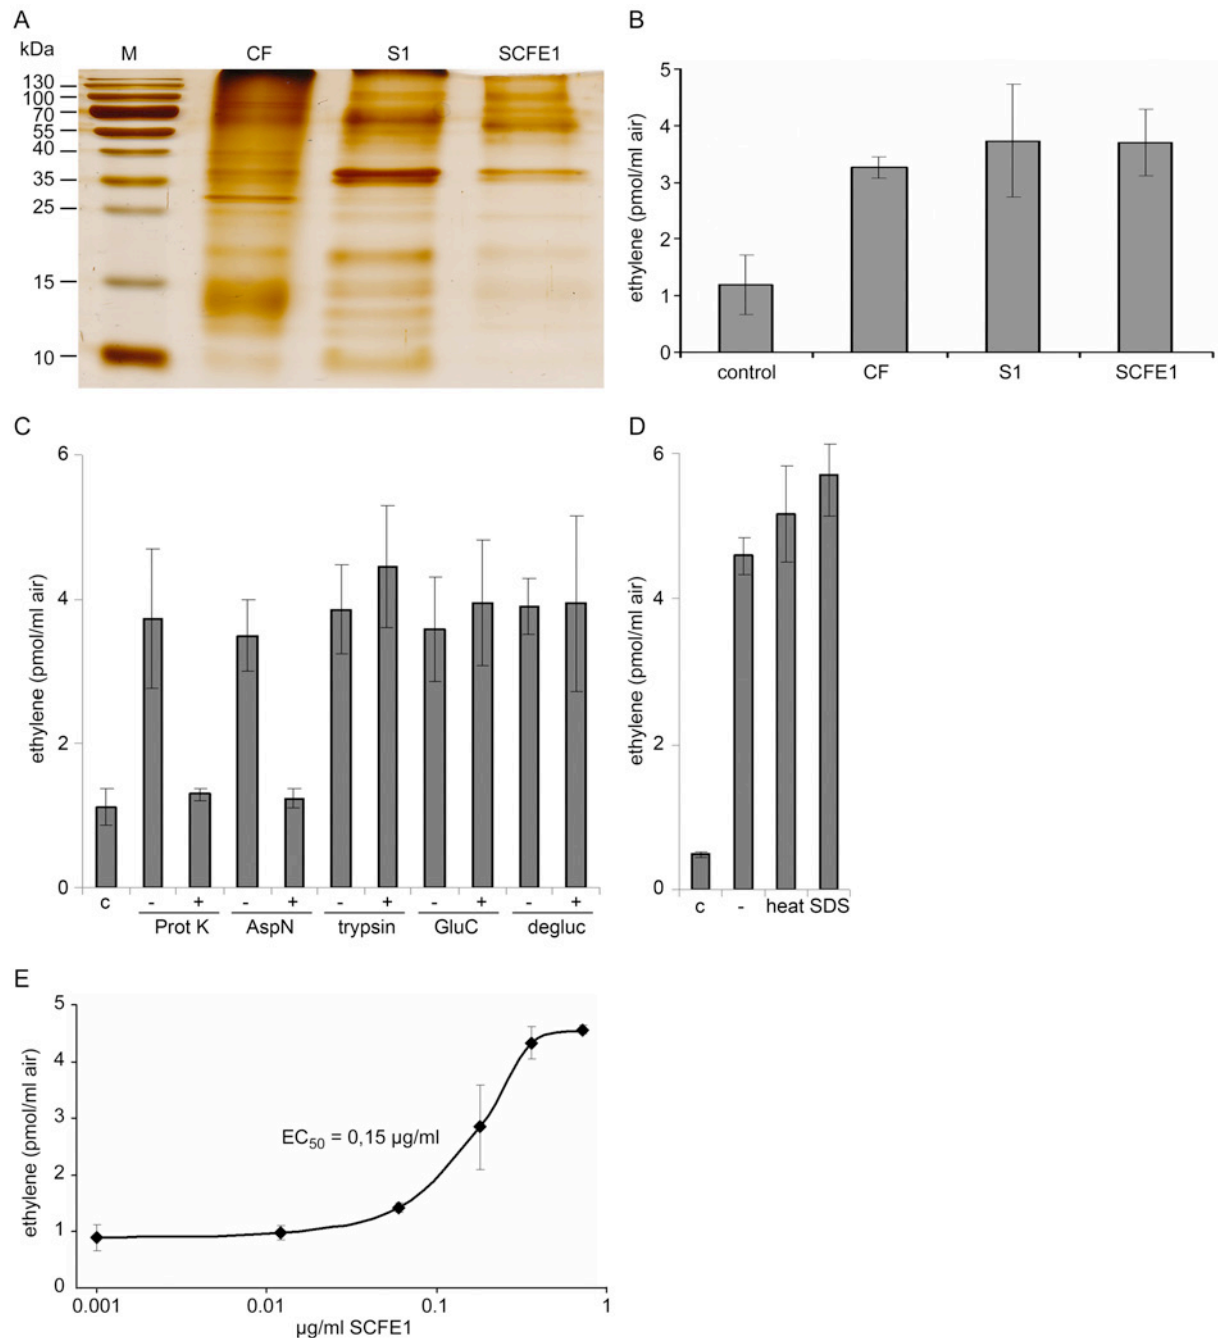

**Supplemental Figure 1. Isolation and physico-chemical properties of the SCFE1-containing fraction.**

**(A)** SDS-PAGE of 2.5 µg *S. sclerotiorum* culture filtrate proteins (CF), 0.4 µg proteins eluted from a Sepharose SP cation exchange chromatography (S1), 0.3 µg proteins re-chromatographed on Source 15S cation exchange FPLC (SCFE1). Standard Protein Molecular Mass Marker (M). Proteins were visualized by silver staining. **(B)** Fractions from *S. sclerotiorum* were tested for ethylene-inducing activity on *Arabidopsis* Col-0 leaf pieces: buffer (control), 6 µg/ml culture filtrate proteins (CF), 0.5 µg/ml proteins eluted from Sepharose SP (S1), 0.35 µg/ml proteins eluted from Source 15S (SCFE1). Ethylene production was measured by gas chromatography 3 h after incubation. Bars represent average values ± S.D. (n=2). The experiment was repeated at least three times with similar results. **(C)** The SCFE1-containing fraction (0.5 µg/ml) was incubated with different proteases (+) - proteinase K (Prot K), AspN, trypsin, GluC, or a commercial deglycosylation mixture (degluc) - or the respective enzyme buffers (-) and tested for ethylene-inducing activity on

*Arabidopsis* Col-0 leaf pieces. Untreated leaf pieces were used as a control (c). Bars represent average values  $\pm$  S.D. (n=2). The experiment was performed two times with similar results. **(D)** Before addition to *Arabidopsis* Col-0 leaf pieces, the SsE1-containing fraction was either left untreated (-), heated for 10 min at 95°C (heat) or incubated in 0.1% SDS for 1 h at room temperature (SDS). Untreated leaf pieces were used as a control (c). Bars represent average values  $\pm$  S.D. (n=2). The experiment was performed two times with similar results. **(E)** Dose-response relationship for SCFE1-induced ethylene production in *Arabidopsis* Col-0 leaves. Represented are average values  $\pm$  S.D. (n=2). The experiment was repeated three times with similar results.

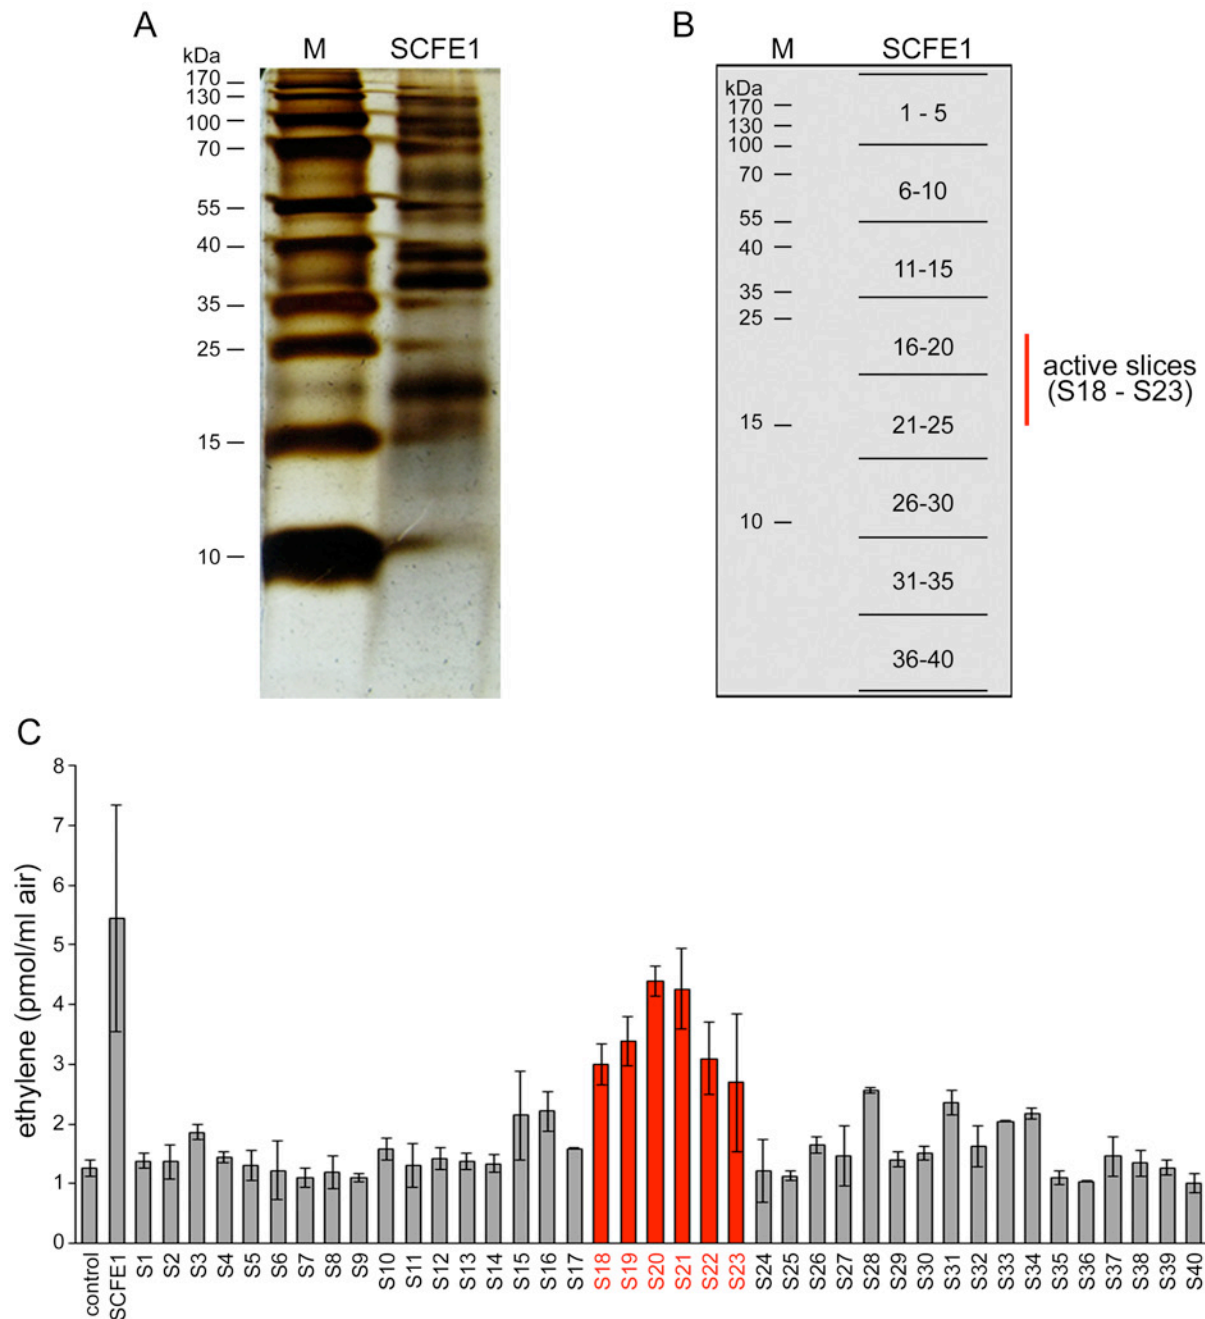

**Supplemental Figure 2. Elicitor activity of SCFE1 can be purified from SDS-PAGE.**

**(A)** SDS-PAGE of 8  $\mu$ g of SCFE1-containing fractions that were pooled and freeze-dried after elution of the Source 15S cation exchange FPLC. Standard Protein Molecular Mass Marker (M). Proteins were visualized by silver staining. **(B)** 50  $\mu$ g of SCFE1-containing fractions that were pooled and freeze-dried after elution of the Source 15S cation exchange FPLC were separated on a tricine-SDS PA gel and the lane was cut into 2 mm large segments (S1-S40) as depicted in the scheme. Each segment was incubated overnight in 100  $\mu$ l 100 mM Mes buffer pH 5.4 containing 0.1% SDS for protein elution. **(C)** 20  $\mu$ l of eluted proteins were tested for ethylene-inducing activity on *Arabidopsis* Col-0 leaf pieces. SCFE1 activity was recovered from gel segments S18-S23 (red) corresponding to proteins with a molecular mass of 16-22 kDa. Buffer (control), 0.35  $\mu$ g/ml proteins eluted from Source 15S (SCFE1). Ethylene production was measured by gas chromatography 3 h after incubation. Bars represent average values  $\pm$  S.D. (n=2). The experiment was repeated three times with similar results.

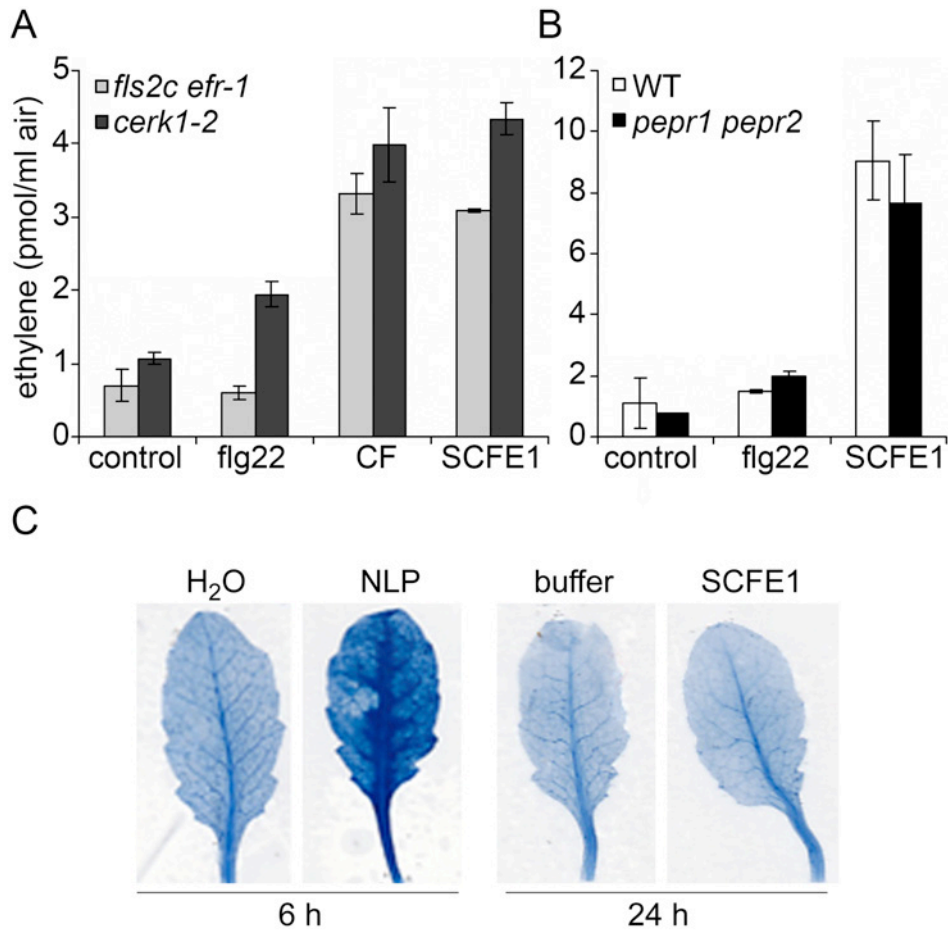

**Supplemental Figure 3. The SCFE1-containing fraction does not induce necrosis and triggers ethylene production independently of known MAMP or DAMP receptors.**

**(A, B)** Leaf pieces of *Arabidopsis* Col-0 wild type plants (WT), the *cerk1* single mutant or the *fls2c efr-1* and *pepr1pepr2* double mutant were treated with *S. sclerotiorum* culture filtrate (CF), 0.5  $\mu$ g/ml of the SCFE1-containing fraction, 500 nM flg22 or left untreated (control) prior to measurement of ethylene production. Bars represent average values  $\pm$  S.D. (n=2). The experiment was repeated two times with similar results. **(C)** The SCFE1-containing fraction was tested for cell death-inducing activity. 0.5  $\mu$ g/ml SCFE1 or 3  $\mu$ M purified NLP from *P. parasitica* were infiltrated into *Arabidopsis* Col-0 leaves. Cell death was visualized by trypan blue staining.

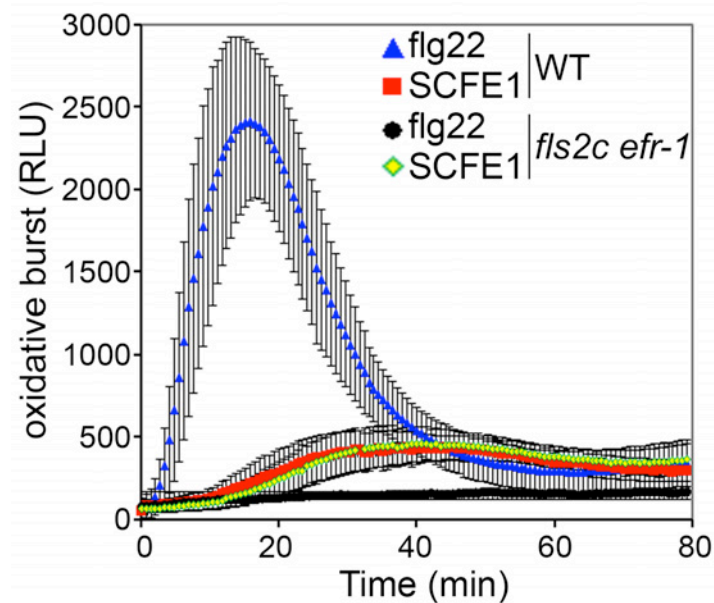

**Supplemental Figure 4. The SCFE1-containing fraction triggers ROS production independently of known MAMP receptors.**

Oxidative burst triggered by 0.12  $\mu\text{g/ml}$  of the SCFE1-containing fraction in *Arabidopsis* Col-0 (red) and the *fls2c efr-1* double mutant (green) leaf discs or by 100 nM flg22 in *Arabidopsis* Col-0 (blue) and the *fls2c efr-1* double mutant (black) leaf discs, measured in relative light units (RLU). Results are means  $\pm$  S.D. (n = 6).

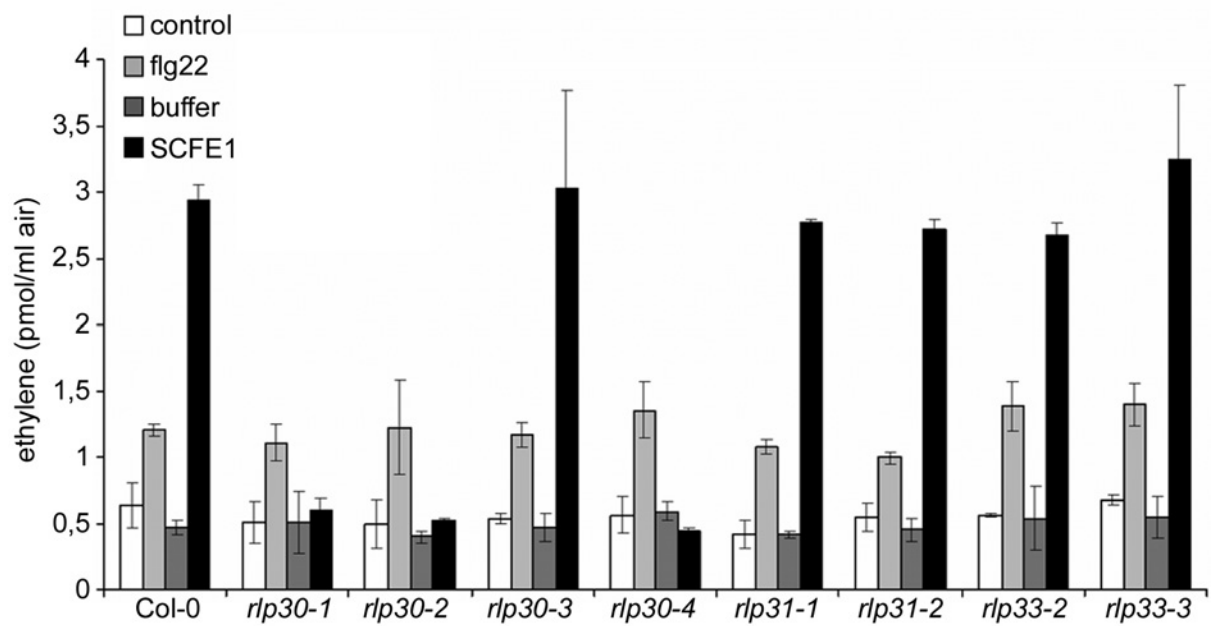

**Supplemental Figure 5. SCFE1-triggered ethylene production in candidate *rlp* mutants.** Ethylene assay in *Arabidopsis* Col-0 plants compared to *rlp* mutants representing candidate genes in the chromosome region mapped for SCFE1 sensitivity. Leaf pieces were treated with 0.25  $\mu$ g/ml of the SCFE1-containing fraction or as a control with 500 nM flg22 or buffer prior measurement of ethylene production. Bars represent average values  $\pm$  S.D. (n=2). The experiment was repeated three times with similar results.

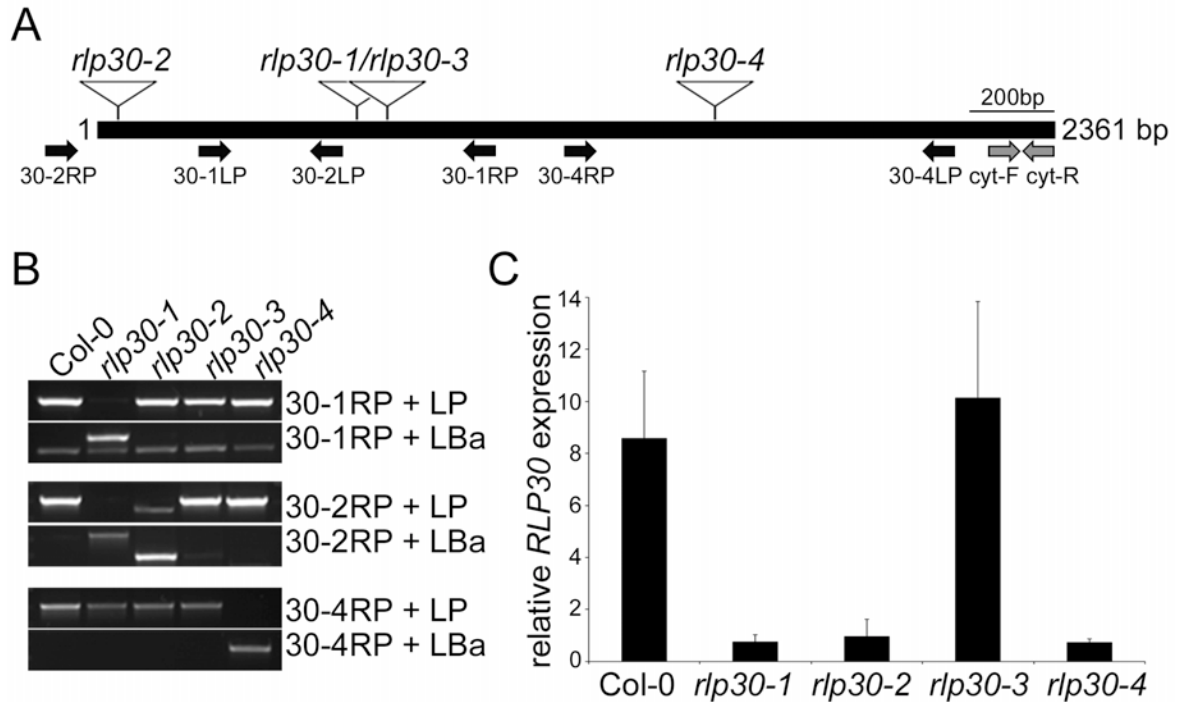

**Supplemental Figure 6. Analysis of *Arabidopsis rlp30* mutants.**

**(A)** Schematic representation of the *RLP30* gene with the positions of the four *rlp30* T-DNA insertions and the primers used for genotyping **(B)** and transcript analysis **(C)**. **(B)** Genomic DNA from Col-0 wild type seedlings or the indicated *rlp30* mutant lines was subjected to PCR using the indicated primer pairs (RP, right border primer; LP, left border primer; LBa, left border primer from the T-DNA insertion). Positions of the primers are depicted in (A). **(C)** Transcriptional profiling of *RLP30* in the different *rlp30* T-DNA insertion lines by quantitative real-time PCR (qRT-PCR). Total RNA from seedlings was subjected to qRT-PCR using *RLP30* specific primers *cyt-F* and *cyt-R*, of which positions are depicted in (A). Gene expression was normalized to the levels of *EF-1 $\alpha$*  transcript. Error bars, S.D. (n=3).

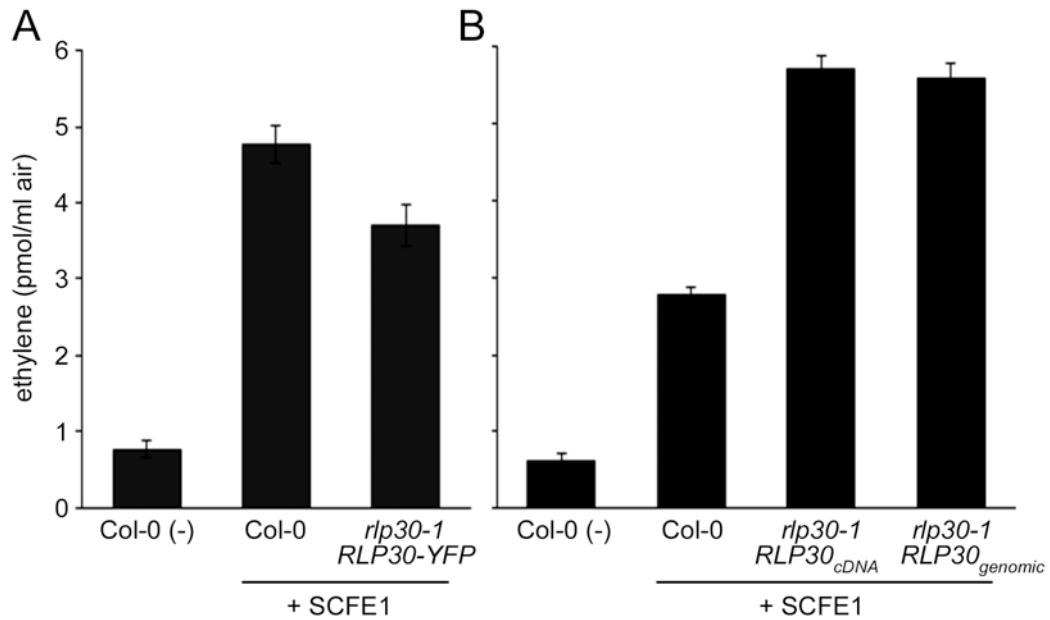

**Supplemental Figure 7. Ethylene response in complemented *rlp30-1* mutant plants.**

Ethylene assay in *Arabidopsis* Col-0 plants and *rlp30-1* mutant lines complemented with constructs *p35S:RLP30-YFP* (A) *p35S:RLP30<sub>cDNA</sub>* and *p35S:RLP30<sub>genomic</sub>* (B). Leaf pieces were treated with 0.25  $\mu$ g/ml SCFE1-containing fraction or left untreated (-) prior to measurement of ethylene production. Bars represent average values  $\pm$  S.D. (n=2). The experiment was repeated with similar results.



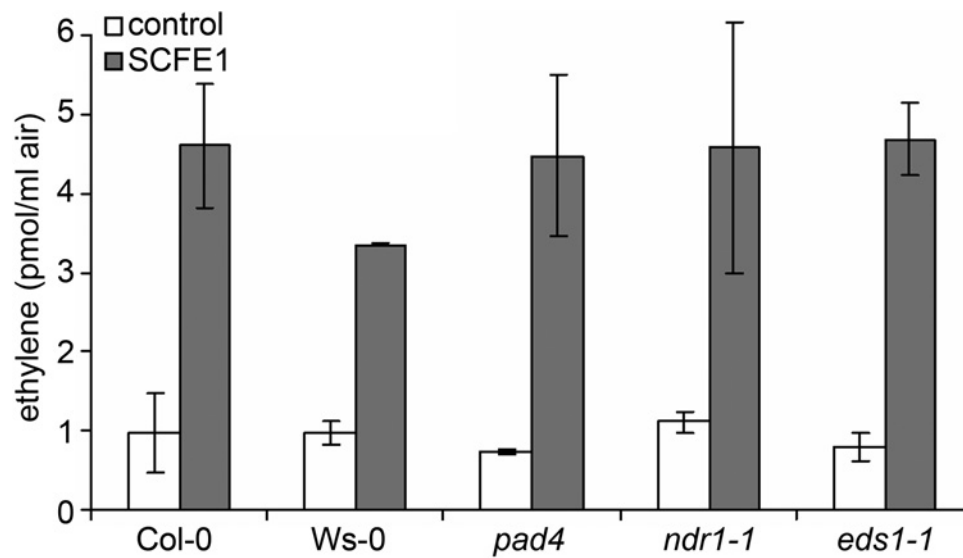

**Supplemental Figure 8. The activity of the SCFE1-containing fraction does not depend on known ETI components.**

Leaf pieces of *pad4*, *ndr1-1* plants (in the Col-0 background) or the *eds1-1* single mutant (in the Ws-0 background) were treated with 0.25  $\mu$ g/ml of the SCFE1-containing fraction or water as a control prior to measurement of ethylene production. Bars represent average values  $\pm$  S.D. (n=2). The experiment was repeated two times with similar results.

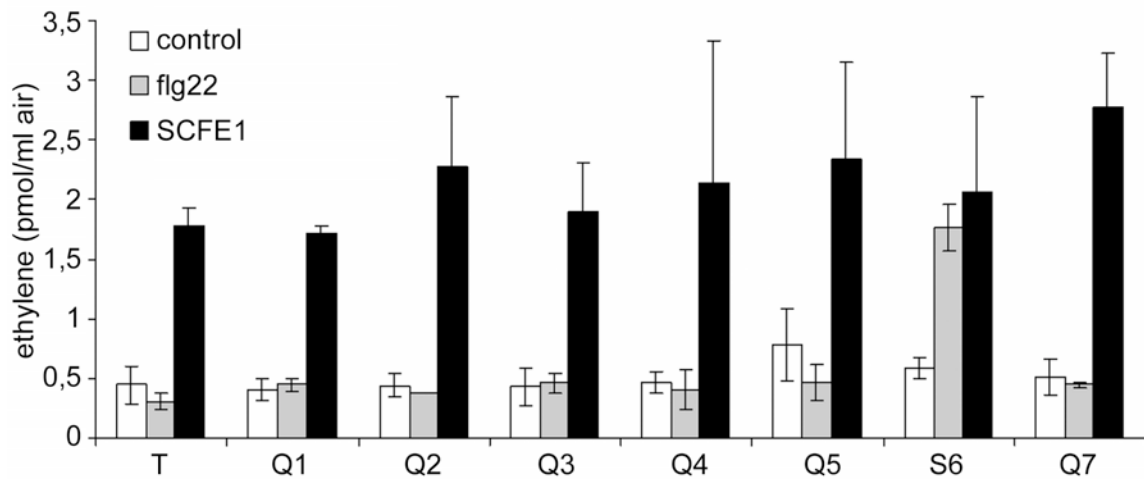

**Supplemental Figure 9. SCFE1 perception does not require LRR-RLK XII family members.**

The SCFE1-containing fraction (0.8  $\mu\text{g/ml}$ ) was tested for ethylene-inducing activity on leaf pieces of indicated *Arabidopsis* mutants. The mutants were the following: T (*fls2 efr cerk1* triple mutant), Q1 (*fls2 efr cerk1 xii1* quadruple mutant), Q2 (*fls2 efr cerk1 xii2*), Q3 (*fls2 efr cerk1 xii3*), Q4 (*fls2 efr cerk1 xii4*), Q5 (*fls2 efr cerk1 xii5*), S6 (*xii6* single mutant), Q7 (*fls2 efr cerk1 xii7*). Nomenclature of the LRR-RLK XII family members was according to Shiu and Bleeker (Shiu and Bleeker, 2001). Bars represent average values  $\pm$  S.D. (n=2). The experiment was performed two times with similar results.

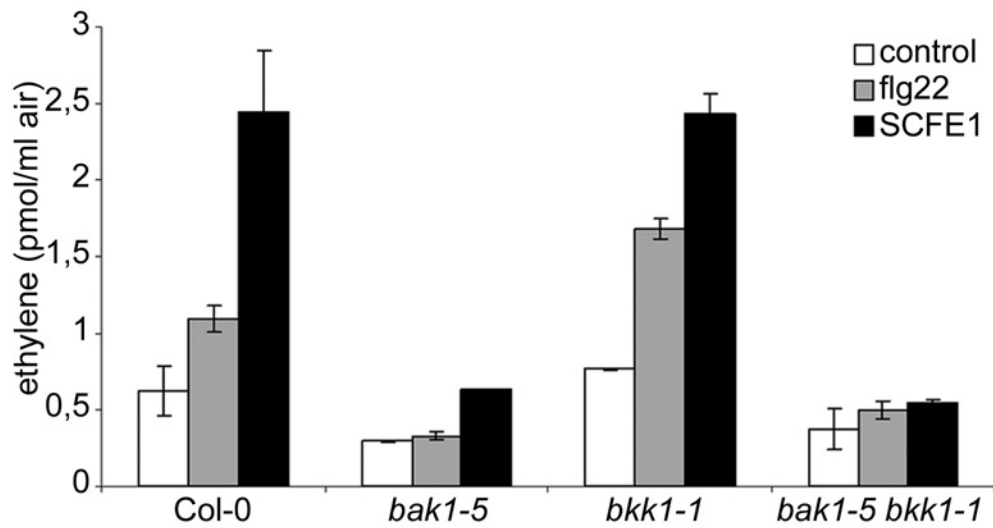

**Supplemental Figure 10. The activity of the SCFE1-containing fraction does not depend on BKK1.**

Leaf pieces of *Arabidopsis* Col-0 wild type plants, *bak1-5* and *bkk1-1* single mutants or the *bak1-5 bkk1-1* double mutant were treated with 0.25  $\mu$ g/ml of the SCFE1-containing fraction, 500 nM flg22 or left untreated (control) prior to measurement of ethylene production. Bars represent average values  $\pm$  S.D. (n=2). The experiment was repeated three times with similar results.

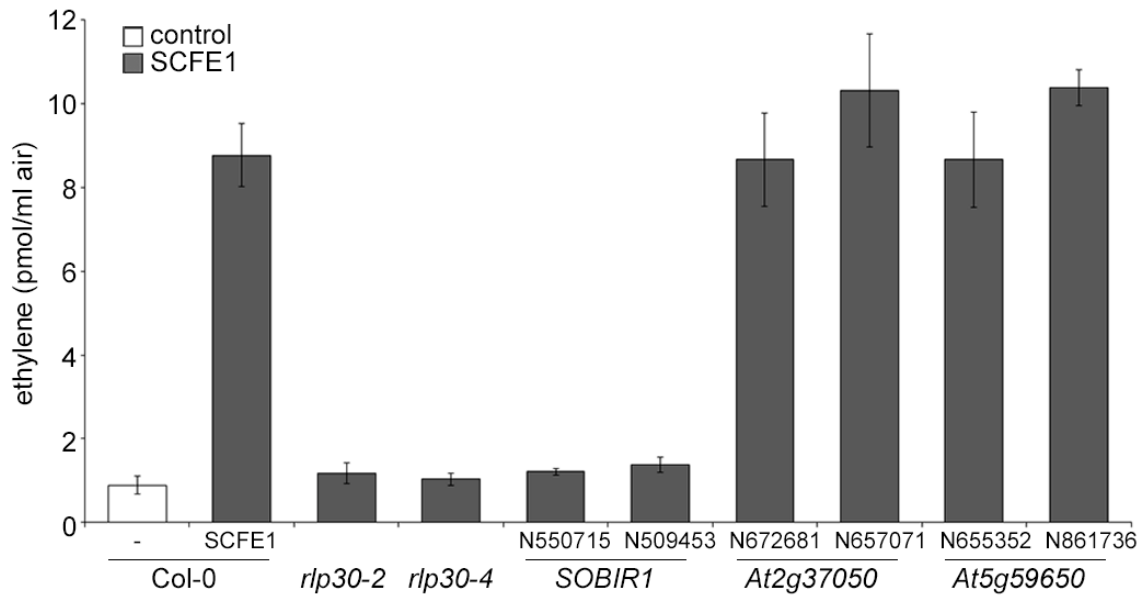

**Supplemental Figure 11. The activity of the SCFE1-containing fraction depends on SOBIR1/EVR.**

Ethylene assay in *Arabidopsis* Col-0 plants compared to *rlk* mutants identified in Y2H as candidate interactors of RLP30. Leaf pieces were treated with 0.25  $\mu$ g/ml of the SCFE1-containing fraction or as a control with 500 nM flg22 or buffer prior measurement of ethylene production. Bars represent average values  $\pm$  S.D. (n=2).

**Supplemental Table 1. SCFE1 sensitivity is controlled by a single recessive gene locus in different *Arabidopsis* accessions.**

| <b>Plants</b>             | <b>Sensitivity</b> | <b>Insensitivity</b> |
|---------------------------|--------------------|----------------------|
| <b>F1 (Mt-0 X Col-0)</b>  | <b>10</b>          | <b>0</b>             |
| <b>F1 (Sq-1 X Col-0)</b>  | <b>10</b>          | <b>0</b>             |
| <b>F1 (Lov-1 X Col-0)</b> | <b>10</b>          | <b>0</b>             |
| <b>F1 (Lov-1 X Mt-0)</b>  | <b>0</b>           | <b>10</b>            |
| <b>F1 (Lov-1 X Sq-1)</b>  | <b>0</b>           | <b>10</b>            |
| <b>F2 (Lov-1 X Col-0)</b> | <b>206</b>         | <b>64</b>            |

The SCFE1-containing fraction was tested for ethylene-inducing activity on leaf pieces of indicated *Arabidopsis* plants (number of plants as shown). Sensitivity: induction level was above the untreated control. Insensitivity: induction level was similar to the untreated control. F2 populations from the Lov-1 x Col-0 cross showed a segregation ratio of 3:1 (206 sensitive versus 64 insensitive plants,  $X^2 = 0.178$ , p-value = 0.67309, using  $X^2$  test and after Yates's correction).

**Supplemental Table 2. Putative interactors of RLP30.**

| AGI ID                    | Functional Description                                                                                            |
|---------------------------|-------------------------------------------------------------------------------------------------------------------|
| <a href="#">AT1G07860</a> | Unknown: BEST <i>Arabidopsis thaliana</i> protein match is: Protein kinase superfamily protein (TAIR:AT1G07870.2) |
| <a href="#">AT1G12670</a> | Unknown protein                                                                                                   |
| <a href="#">AT1G13770</a> | RUS3, Protein of unknown function, DUF647                                                                         |
| <a href="#">AT1G14020</a> | O-fucosyltransferase family protein                                                                               |
| <a href="#">AT1G14360</a> | ATUTR3, UTR3, UDP-galactose transporter 3                                                                         |
| <a href="#">AT1G17280</a> | UBC34, ubiquitin-conjugating enzyme 34                                                                            |
| <a href="#">AT1G19570</a> | DHAR1, ATDHAR1, DHAR5, dehydroascorbate reductase                                                                 |
| <a href="#">AT1G21240</a> | <b>WAK3, wall associated kinase 3 RLK/Pelle</b>                                                                   |
| <a href="#">AT1G21870</a> | GONST5, golgi nucleotide sugar transporter 5                                                                      |
| <a href="#">AT1G23300</a> | MATE efflux family protein                                                                                        |
| <a href="#">AT1G27290</a> | Unknown protein                                                                                                   |
| <a href="#">AT1G29060</a> | Target SNARE coiled-coil domain protein                                                                           |
| <a href="#">AT1G31812</a> | ACBP6, ACBP, acyl-CoA-binding protein 6                                                                           |
| <a href="#">AT1G34640</a> | peptidases                                                                                                        |
| <a href="#">AT1G45145</a> | ATTRX5, ATH5, LIV1, TRX5, thioredoxin H-type 5                                                                    |
| <a href="#">AT1G63110</a> | GPI transamidase subunit PIG-U                                                                                    |
| <a href="#">AT1G63120</a> | ATRBL2, RBL2, RHOMBOID-like 2                                                                                     |
| <a href="#">AT1G65690</a> | Late embryogenesis abundant (LEA) hydroxyproline-rich glycoprotein family                                         |
| <a href="#">AT1G77350</a> | Unknown protein                                                                                                   |
| <a href="#">AT1G78240</a> | TSD2, QUA2, S-adenosyl-L-methionine-dependent methyltransferases superfamily protein                              |
| <a href="#">AT1G78380</a> | ATGSTU19, GST8, GSTU19, glutathione S-transferase TAU 19                                                          |
| <a href="#">AT2G22425</a> | Microsomal signal peptidase 12 kDa subunit (SPC12)                                                                |
| <a href="#">AT2G26180</a> | IQD6, IQ-domain 6 (Calcium binding)                                                                               |
| <a href="#">AT2G27290</a> | Protein of unknown function (DUF1279)                                                                             |
| <a href="#">AT2G28315</a> | Nucleotide/sugar transporter family protein                                                                       |
| <a href="#">AT2G31880</a> | <b>SOBIR1, EVR, Leucine-rich repeat protein kinase family protein</b>                                             |
| <a href="#">AT2G36305</a> | RCE1, ATFACE-2, ATFACE2, FACE2, farnesylated protein-converting enzyme 2                                          |
| <a href="#">AT2G37050</a> | <b>Leucine-rich repeat protein kinase family protein</b>                                                          |
| <a href="#">AT2G41490</a> | GPT, UDP-glcnae-adolichol phosphate glcnae-1-p-transferase                                                        |
| <a href="#">AT3G01360</a> | Family of unknown function (DUF716)                                                                               |
| <a href="#">AT3G03210</a> | Unknown protein                                                                                                   |
| <a href="#">AT3G10640</a> | VPS60.1, SNF7 family protein                                                                                      |
| <a href="#">AT3G11550</a> | Uncharacterised protein family (UPF0497)                                                                          |
| <a href="#">AT3G12180</a> | Cornichon family protein                                                                                          |
| <a href="#">AT3G13175</a> | Unknown protein                                                                                                   |
| <a href="#">AT3G17000</a> | UBC32, ubiquitin-conjugating enzyme 32                                                                            |
| <a href="#">AT3G17210</a> | ATHS1, HS1, heat stable protein 1                                                                                 |
| <a href="#">AT3G18800</a> | Unknown protein                                                                                                   |
| <a href="#">AT3G20600</a> | NDR1, Late embryogenesis abundant (LEA) hydroxyproline-rich glycoprotein family                                   |
| <a href="#">AT3G25805</a> | Unknown protein                                                                                                   |
| <a href="#">AT3G26020</a> | Protein phosphatase 2A regulatory B subunit family protein                                                        |
| <a href="#">AT3G57650</a> | LPAT2, lysophosphatidyl acyltransferase 2                                                                         |
| <a href="#">AT3G62560</a> | Ras-related small GTP-binding family protein                                                                      |
| <a href="#">AT3G66654</a> | Cyclophilin-like peptidyl-prolyl cis-trans isomerase family protein                                               |
| <a href="#">AT4G14455</a> | ATBET12, BET12, ATBS14B, BS14B, Target SNARE coiled-coil                                                          |

|                           |                                                                                                                                                          |
|---------------------------|----------------------------------------------------------------------------------------------------------------------------------------------------------|
|                           | domain protein                                                                                                                                           |
| <a href="#">AT4G20790</a> | <b>Leucine-rich repeat protein kinase family protein</b>                                                                                                 |
| <a href="#">AT4G23010</a> | ATUTR2, UTR2, UDP-galactose transporter 2                                                                                                                |
| <a href="#">AT4G23400</a> | PIP1D, PIP1;5, plasma membrane intrinsic protein 1;5                                                                                                     |
| <a href="#">AT4G27780</a> | ACBP2, acyl-CoA binding protein 2                                                                                                                        |
| <a href="#">AT4G29330</a> | DER1, DERLIN-1                                                                                                                                           |
| <a href="#">AT4G30500</a> | Protein of unknown function (DUF788)                                                                                                                     |
| <a href="#">AT4G30850</a> | HHP2, heptahelical transmembrane protein2                                                                                                                |
| <a href="#">AT4G37370</a> | CYP81D8, cytochrome P450, family 81, subfamily D, polypeptide 8                                                                                          |
| <a href="#">AT4G37680</a> | HHP4, heptahelical protein 4                                                                                                                             |
| <a href="#">AT4G38690</a> | PLC-like phosphodiesterases superfamily protein                                                                                                          |
| <a href="#">AT4G39890</a> | AtRABH1c, RABH1c, RAB GTPase homolog H1C                                                                                                                 |
| <a href="#">AT5G06320</a> | NHL3, NDR1/HIN1-like 3                                                                                                                                   |
| <a href="#">AT5G11890</a> | Unknown: BEST <i>Arabidopsis thaliana</i> protein match is: Late embryogenesis abundant (LEA) hydroxyproline-rich glycoprotein family (TAIR:AT1G17620.1) |
| <a href="#">AT5G21920</a> | YLMG2, ATYLMG2, YGGT family protein                                                                                                                      |
| <a href="#">AT5G35460</a> | Protein of unknown function DUF2838                                                                                                                      |
| <a href="#">AT5G42980</a> | ATTRX3, ATH3, ATTRXH3, TRXH3, TRX3, thioredoxin 3                                                                                                        |
| <a href="#">AT5G49540</a> | Rab5-interacting family protein                                                                                                                          |
| <a href="#">AT5G52240</a> | MSBP1, membrane steroid binding protein 1                                                                                                                |
| <a href="#">AT5G52420</a> | Unknown protein                                                                                                                                          |
| <a href="#">AT5G59650</a> | <b>Leucine-rich repeat protein kinase family protein</b>                                                                                                 |
| <a href="#">AT5G63030</a> | Thioredoxin superfamily protein                                                                                                                          |

Original data retrieved from the membrane-based Interactome Network Database (<http://www.associomics.org/Associomics/Home.html>). RLK-type proteins are indicated in bold.

**Supplemental Table 3. *Arabidopsis* mutant and transgenic lines used in this study**

| AGI              | Gene name           | Mutant name              | Stock name          | Reference                   |
|------------------|---------------------|--------------------------|---------------------|-----------------------------|
| <i>At3g05360</i> | <i>RLP30</i>        | <i>rlp30-1</i>           | SALK_122528         | (Wang et al., 2008)         |
|                  |                     | <i>rlp30-2</i>           | SALK_008911         |                             |
|                  |                     | <i>rlp30-3</i>           | SALK_122536         |                             |
|                  |                     | <i>rlp30-4</i>           | SALK_145342         |                             |
| <i>At3g05370</i> | <i>RLP31</i>        | <i>rlp31-1</i>           | SALK_058586         | (Wang et al., 2008)         |
|                  |                     | <i>rlp31-2</i>           | SALK_094160         |                             |
| <i>At3g05660</i> | <i>RLP33</i>        | <i>rlp33_2</i>           | SALK_087631         | (Wang et al., 2008)         |
|                  |                     | <i>rlp33_3</i>           | SALK_085252         |                             |
| <i>At5g20480</i> | <i>EFR</i>          | <i>efr-1</i>             | SALK_044334         | (Zipfel et al., 2006)       |
| <i>At5g46330</i> | <i>FLS2</i>         | <i>fls2c</i>             | SAIL_691C4          | (Zipfel et al., 2004)       |
| <i>At4g33430</i> | <i>BAK1</i>         | <i>bak1-3</i>            | SALK_034532         | (Schwessinger et al., 2011) |
|                  |                     | <i>bak1-4</i>            | SALK_116202         |                             |
|                  |                     | <i>bak1-5</i>            | EMS-mutant          |                             |
| <i>At2g13790</i> | <i>BKK1</i>         | <i>bkk1-1</i>            | SALK_057955         | (Roux et al., 2009)         |
| <i>At1g73080</i> | <i>PEPR1</i>        | <i>pepr1</i>             | SALK_059281         | (Krol et al., 2010)         |
| <i>At3g21630</i> | <i>CERK1</i>        | <i>cerk1-2</i>           | GK_096F09           | (Miya et al., 2007)         |
| <i>At1g17750</i> | <i>PEPR2</i>        | <i>pepr2</i>             | SALK_098161         | (Krol et al., 2010)         |
| <i>At3g52430</i> | <i>PAD4</i>         | <i>pad4-1</i>            | EMS-mutant          | (Jirage et al., 1999)       |
| <i>At3g20600</i> | <i>NDR1</i>         | <i>ndr1-1</i>            | Fast-neutron-Mutant | (Century et al., 1995)      |
| <i>At3g48090</i> | <i>EDS1</i>         | <i>eds1-1</i>            | EMS-mutant          | (Aarts et al., 1998)        |
| <i>At1g35710</i> | <i>XII1</i>         | <i>xii1-2</i>            | GK-031G02           | This study                  |
| <i>At2g24130</i> | <i>XII2</i>         | <i>xii2-1</i>            | SAIL_373_E04        |                             |
| <i>At3g47090</i> | <i>XII3</i>         | <i>xii3-1</i>            | SALK_101474         |                             |
| <i>At3g47110</i> | <i>XII4</i>         | <i>xii4-1</i>            | SALK_101668         |                             |
| <i>At3g47570</i> | <i>XII5</i>         | <i>xii5-1</i>            | GK-415H04           |                             |
| <i>At3g47580</i> | <i>XII6</i>         | <i>xii6-1</i>            | SAIL_31_F02         |                             |
| <i>At4g08850</i> | <i>XII7</i>         | <i>xii7-1</i>            | SALK_061769         |                             |
| <i>At2g31880</i> | <i>SOBIR1 (EVR)</i> | <i>sobir1-12 (evr-3)</i> | SALK_050715         |                             |
|                  |                     | <i>sobir1-13 (evr-4)</i> | SALK_009453         | (Leslie et al., 2010)       |
| <i>At2g37050</i> | <i>LRR-KINASE</i>   | <i>lrr-kinase</i>        | SALK_143700C        | This study                  |
|                  |                     |                          | SALK_071422C        |                             |
| <i>At5g59650</i> | <i>LRR-KINASE</i>   | <i>lrr-kinase</i>        | SALK_022711C        | This study                  |
|                  |                     |                          | SAIL_1297_H07       |                             |



**Supplemental Table 4. Primers used for map-based cloning.**

| <b>Marker name</b> | <b>Polymorphism Col-0/Lov-1</b> | <b>Primer name</b> | <b>Primer sequence (5' – 3')</b> |
|--------------------|---------------------------------|--------------------|----------------------------------|
| F11A12             | Rsal digest                     | F11A12-F           | GATATGCAGCTGATTGCAGAAG           |
|                    |                                 | F11A12-R           | TCACGTCATCGACTAGCTGTTT           |
| MSJ11              | 442bp/262bp                     | MSJ11-F            | GTGCGACGTGCAAAAACCTTAA<br>AG     |
|                    |                                 | MSJ11-R            | GAGTTGTAGATAGAGACATCAT<br>GG     |
| F21O3              | Alul digest                     | F21O3-F            | GGTGAGTTTTTCATCACCAACAT          |
|                    |                                 | F21O3-R            | ATCAAATGGCCGTCTTTGTG             |
| T9J14              | ScrFI digest                    | T9J14-F            | CGGAGCTGATCTCGAATTGT             |
|                    |                                 | T9J14-R            | ATCGGTGGTCTCTGATGGAC             |

**Supplemental Table 5. Primers used in qPCR analyses.**

| Gene name                                      | Primer name  | Primer sequence (5' – 3')        |
|------------------------------------------------|--------------|----------------------------------|
| <i>At3g05360</i><br>( <i>RLP30</i> )           | RLP-fd       | CATGACCAAAGGGATGCTCT             |
|                                                | RLP30-rv     | ACCTCGCCAGATTCATCATC             |
|                                                | RLP30cyt-F   | ACTGCACACAAACACGAG               |
|                                                | RLP30cyt-R   | TCAACGAGCACTTGTGGTG              |
| <i>At2g19190</i> ( <i>FRK1</i> )               | FRK1-100-F   | AGCGGTCAGATTTCAACAGT             |
|                                                | FRK1-100-R   | AAGACTATAAACATCACTCT             |
| <i>At3g26830</i> ( <i>PAD3</i> )               | PAD3-F       | CTTTAAGCTCGTGGTCAAGGAGAC         |
|                                                | PAD3-R       | TGGGAGCAAGAGTGGAGTTGTTG          |
| <i>At3g04720</i><br>( <i>PR-4</i> )            | PR4-F        | GCAAGTATGGCTGGACCGCCT            |
|                                                | PR4-R        | CCAAGCCTCCGTTGCTGCATTG           |
| <i>At2g30770</i><br>( <i>CYP71A13</i> )        | CYP71A13-F   | GTGCTTCGGTTGCATCCTTCTC           |
|                                                | CYP71A13-R   | CGCCCAAGCATTGATTATCACCTC         |
| <i>At1g07920/30/40</i><br>( <i>EF-1α</i> )     | EF1a-F       | TCACATCAACATTGTGGTCATTGG         |
|                                                | EF1a-R       | TTGATCTGGTCAAGAGCCTACAG          |
| <i>At5g09810</i><br>( <i>Actin</i> )           | Actin-fd     | AGTGGTCGTACAACCGGTATTGT          |
|                                                | Actin-rv     | GAGGAAGAGCATACCCCTCGTA           |
| <i>Atcg00490</i><br>( <i>Rubisco</i> )         | AtRubisco-QF | GCAAGTGTTGGGTTCAAAGCTGGTG        |
|                                                | AtRubisco-QR | CCAGGTTGAGGAGTTACTCGGAATG<br>CTG |
| <i>KC748491</i><br>( <i>Sclerotinia ITS</i> )  | Scl-qPCR-F   | GGATCTCTTGGTTCTGGCAT             |
|                                                | Scl-qPCR-R   | GCAATGTGCGTTCAAAGATT             |
| <i>BC1G_08198</i><br>( <i>Botrytis Actin</i> ) | Bc_actin_qF  | CCTCACGCCATTGCTCGTGT             |
|                                                | Bc_actin_qR  | TTTCACGCTCGGCAGTGGTGG            |

## Supplemental Methods

### Enzymatic, chemical and thermal treatments of the SCFE1-containing fraction

To characterize the chemical nature of elicitor activity, the SCFE1-containing fraction was incubated with different proteases. For complete protein digestion, proteinase K (Roche) was added to SCFE1-containing fractions to a final concentration of 0.25 µg/µl. Samples were incubated for 1 h at 37 °C. For partial protein digestion, fractions were treated with the endoproteases AspN, GluC or trypsin (New England Biolabs) according to the manufacturer's protocols. AspN digestion was performed at 37 °C for 1 h, whereas GluC and trypsin digestions were performed at 25 °C for 1 h. To test whether glycosylation is important for elicitor activity, the SCFE1-containing fraction was incubated with a deglycosylation enzyme cocktail (New England Biolabs) in non-denaturing reaction conditions for 4 h at 37 °C according to the manufacturer's instructions. The importance of the native structure of SCFE1 for elicitor activity was investigated either by addition of SDS to a final concentration of 0.1 % or by heating at 95 °C for 10 min.

### Tricine SDS-PAGE of the SCFE1-containing fraction

Compared to the conventional Laemmli SDS-PAGE system, the Tricine SDS-PAGE is more suitable for the separation of small proteins (Schagger, 2006). Tricine SDS-PAGE was carried out by using the Mini-PROTEAN 3 system (Biorad) and discontinuous polyacrylamide gels were prepared as described (Schagger, 2006). In this study, a 12% running gel and a 4% stacking gel were used. The upper buffer chamber was filled with cathode buffer (500 ml: 6.055 g Tris base, 8.96 g Tricine and 0.5 g SDS), and the lower chamber was filled with anode buffer (500 ml: 12.11 g Tris base, pH 8.9). Active fractions containing SCFE1 were pooled and freeze-dried before being resuspended in NOVEX 2X Tricine-SDS sample buffer (10 ml: 3.0 ml 3.0 M Tris-HCl, pH 8.45, 2.4 ml glycerol, 0.8 g SDS, 1.5 ml 0.1% Coomassie Brilliant Blue G-250, 0.5 ml 0.1% Phenol Red). The SCFE1-containing sample was heated for 5 min at 95 °C and subsequently electrophoresed at 15-30 mA until the dye was eluted from the gel.

### Plant material

The transgenic *pPR-1:GUS* and *p35S:RLP30-YFP* lines and the T-DNA insertion lines for *RLP 30* (*rlp30-1*, SALK\_122528; *rlp30-2* SALK\_008911; *rlp30-3*, SALK\_122536; *rlp30-4*, SALK\_145342), *RLP31* (*rlp31-1*, SALK\_058586; *rlp31-2*, SALK\_094160), *RLP33* (*rlp33-2*, SALK\_087631; *rlp33-3*, SALK\_085252), *BAK1* (*bak1-3*, SALK\_034523; *bak1-4*, SALK\_116202; *bak1-5*, EMS-mutant), *BKK1* (*bkk1-1*, SALK\_057955), *SOBIR1* (*sobir1-12*, SALK\_009453; *sobir1-13*, SALK\_009453), *CERK1* (*cerk1-2*, GABI\_096F09) and the double mutants *bak1-5 bkk1-1*, *fls2c efr-1* and *pepr1 pepr2* have been characterized previously (Shapiro and Zhang, 2001; Chinchilla et al., 2007; Miya et al., 2007; Wang et al., 2008; Gao et al., 2009; Nekrasov et al., 2009; Krol et al., 2010; Leslie et al., 2010; Roux et al., 2011; Schwessinger et al., 2011)

To generate *fls2 efr cerk1 xii* quadruple mutants, *Arabidopsis xii* single mutants in the Col-0 background were crossed with the *fls2c efr-1 cerk1-2* triple mutant (Gimenez-Ibanez et al., 2009). T-DNA insertion in *fls2c* confers resistance to BASTA and T-DNA insertion in *cerk1-2* confers resistance to sulfadiazine. F2 seeds were surface-sterilized and germinated on MS medium supplemented with 10 mg/L phosphinotricine (Duchefa) and 5.25 mg/L sulfadiazine sodium salt (Sigma). 50 mg/L kanamycin was added as a third antibiotic for the selection of seedlings carrying *xii(x-x)*. Seedlings were assayed for their responses to elf18 (growth inhibition assay, (Zipfel et al., 2006)), flg22 and chitin (Albrecht et al., 2012). Insensitive plants were subsequently genotyped for the T-DNA insertions in *fls2c*, *efr-1*, *cerk1-2* and the mutation of the family *XII* gene of interest using the primers indicated below. Primers were

designed with the iSect tool (<http://signal.salk.edu/tdnaprimers.2.html>) and Primer 3 (<http://primer3.wi.mit.edu/>).

| Gene name                                     | Mutant name    | Mutant-ID    | Primer name | Primer sequence (5' - 3')                      |
|-----------------------------------------------|----------------|--------------|-------------|------------------------------------------------|
| <i>RLP30</i><br>( <a href="#">At3g05360</a> ) | <i>rlp30-1</i> | SALK_122528  | 30-1LP      | GAATCTGGCGTGGTGGTTCAC                          |
|                                               |                |              | 30-1RP      | GCCCAACTAAGTTGTTGTGG                           |
|                                               | <i>rlp30-2</i> | SALK_008911  | 30-2LP      | TCCCGACAAATGAATTCTCAC                          |
|                                               |                |              | 30-2RP      | TGTCGACGAGAAGCTTAGCTC                          |
|                                               | <i>rlp30-3</i> | SALK_122536  | 30-1LP      | GAATCTGGCGTGGTGGTTCAC                          |
|                                               |                |              | 30-1RP      | GCCCAACTAAGTTGTTGTGG                           |
|                                               | <i>rlp30-4</i> | SALK_145342  | 30-4LP      | TCAACTTGTTCTTCTGGTCCG                          |
|                                               |                |              | 30-4RP      | TGGACTTGGTTCGAATTCAC                           |
| <i>FLS2</i><br>( <a href="#">At5g46330</a> )  | <i>fls2c</i>   | SAIL_691_C4  | FLS2-LP     | GGAGACAGAACACCTTCAAGT                          |
|                                               |                |              | FLS2-RP     | TGACCAGATTCCTCAATAGTC                          |
| <i>EFR</i><br>( <a href="#">At5g20480</a> )   | <i>efr-1</i>   | SALK_044334  | EFR-LP      | CCATCCCTCGCTTACATAGATTTGTC                     |
|                                               |                |              | EFR-RP      | GCTGCAGCCACATATCCAGAC                          |
| <i>CERK1</i><br>( <a href="#">At3g21630</a> ) | <i>cerk1-2</i> | GK-096F09    | CERK1-LP    | AGCAACTCGGGGTGCAATGGGT                         |
|                                               |                |              | CERK1-RP    | CCTAGTCTAGACCGGCCGGACATAAG<br>ACTGACTAAATCTTCG |
| <i>XII1</i><br>( <a href="#">At1g35710</a> )  | <i>xii1-2</i>  | GK-031G02    | XII1-LP     | GCTTTTCGAAACGTTGGAGT                           |
|                                               |                |              | XII1-RP     | CGCCAGGAGTAGCAAACCTCT                          |
| <i>XII2</i><br>( <a href="#">At2g24130</a> )  | <i>xii2-1</i>  | SAIL_373_E04 | XII2-LP     | TCAAGTTACACACGCGTTCAC                          |
|                                               |                |              | XII2-RP     | ACTGAAGTTGTGGCATCTTGC                          |
| <i>XII3</i><br>( <a href="#">At3g47090</a> )  | <i>xii3-1</i>  | SALK_101474  | XII3-LP     | CCTGCAAAGTTTGAGAAGAAC                          |
|                                               |                |              | XII3-RP     | GGGAGCAATTAGTCAAAGCATC                         |
| <i>XII4</i><br>( <a href="#">At3g47110</a> )  | <i>xii4-1</i>  | SALK_101668  | XII4-LP     | ACCCCTTCCGTTGGCACAGC                           |
|                                               |                |              | XII4-RP     | GGTACCATTCCAGAGACACTTTCCA                      |
| <i>XII5</i><br>( <a href="#">At3g47570</a> )  | <i>xii5-1</i>  | GK-415H04    | XII5-LP     | TAAACGAGATGAATGCTTCTTCACCAC<br>AGA             |
|                                               |                |              | XII5-RP     | GAGAACAATCTGACAGGAAGTATTCTC<br>AC              |

---

|                                              |               |             |         |                                         |
|----------------------------------------------|---------------|-------------|---------|-----------------------------------------|
| <i>XII6</i><br>( <a href="#">At3g47580</a> ) | <i>xii6-1</i> | SAIL_31_F02 | XII6-LP | AATGCTTTGTCTCCACTGGTG                   |
|                                              |               |             | XII6-RP | AATGGTGGGTCTTGGGTTATC                   |
| <i>XII7</i><br>( <a href="#">At4g08850</a> ) | <i>xii7-1</i> | SALK_061769 | XII7-LP | AACGGATCGATTCTTCTGA                     |
|                                              |               |             | XII7-RP | TTTTGCCTGATAGCCGATTC                    |
| SALK                                         |               |             | LBa     | TGGTTCACGTAGTGGGCCATCG                  |
| SALK                                         |               |             | LBb1.3  | ATTTTGCCGATTTTCGGAAC                    |
| SAIL                                         |               |             | LB3SAIL | TAGCATCTGAATTTTCATAACCAATCTCG<br>ATACAC |
| GABI                                         |               |             | o8409   | ATATTGACCATCATACTCATTGC                 |

---

### Cloning of RLP30 constructs for complementation in the *rlp30* mutant

*RLP30* is predicted to be a single exon. This was confirmed by sequencing full-length cDNA from Col-0 amplified using RT-PCR. The resulting cDNA was cloned into the gateway entry vector pDONR/Zeo using BP clonase (Invitrogen) and subsequently transferred to the gateway compatible binary vector pEarleyGate101 (Earley et al., 2006) using LR clonase (Invitrogen). This resulted in a plasmid where *AtRLP30* was fused to YFP-HA and expression was driven by the CaMV 35S promoter. The *rlp30-1* mutant was transformed with this plasmid using the floral dip method (Clough and Bent, 1998). Transformed plants were selected on soil soaked with 150mg/l Basta herbicide (glufosinate-ammonium, Bayer CropScience) and confirmed by PCR. Plants were checked for fluorescence using an Olympus IX70 microscope equipped with a Fluroview 300 confocal laser scanning unit. RLP30-YFP-HA fluorescence was excited with a 488nm argon laser and fluorescence detected between 510nm and 530nm (Wang et al., 2008).

*RLP30* cDNA was also cloned in the same way into the gateway compatible binary vector pEarleyGate100 (Earley et al., 2006) using LR clonase (Invitrogen). This resulted in a plasmid (*RLP30<sub>cDNA</sub>*) where *RLP30* was driven by the CaMV 35S promoter without any fusion for complementation study. Similarly *RLP30* genomic DNA was cloned into the vector pEarleyGate100 where the gene was driven by the native promoter. Both constructs were also transformed into the *rlp30-1* and the transgenic lines were selected using Basta and confirmed by PCR.

## Supplemental References

- Aarts, N., Metz, M., Holub, E., Staskawicz, B.J., Daniels, M.J., and Parker, J.E.** (1998). Different requirements for EDS1 and NDR1 by disease resistance genes define at least two R gene-mediated signaling pathways in Arabidopsis. *Proceedings of the National Academy of Sciences* **95**, 10306-10311.
- Albrecht, C., Boutrot, F., Segonzac, C., Schwessinger, B., Gimenez-Ibanez, S., Chinchilla, D., Rathjen, J.P., de Vries, S.C., and Zipfel, C.** (2012). Brassinosteroids inhibit pathogen-associated molecular pattern-triggered immune signaling independent of the receptor kinase BAK1. *Proc Natl Acad Sci U S A* **109**, 303-308.
- Century, K.S., Holub, E.B., and Staskawicz, B.J.** (1995). NDR1, a locus of Arabidopsis thaliana that is required for disease resistance to both a bacterial and a fungal pathogen. *Proceedings of the National Academy of Sciences* **92**, 6597-6601.
- Chinchilla, D., Zipfel, C., Robatzek, S., Kemmerling, B., Nurnberger, T., Jones, J.D., Felix, G., and Boller, T.** (2007). A flagellin-induced complex of the receptor FLS2 and BAK1 initiates plant defence. *Nature* **448**, 497-500.
- Clough, S.J., and Bent, A.F.** (1998). Floral dip: a simplified method for Agrobacterium-mediated transformation of Arabidopsis thaliana. *Plant J* **16**, 735-743.
- Earley, K.W., Haag, J.R., Pontes, O., Opper, K., Juehne, T., Song, K., and Pikaard, C.S.** (2006). Gateway-compatible vectors for plant functional genomics and proteomics. *Plant J* **45**, 616-629.
- Gao, M.H., Wang, X., Wang, D.M., Xu, F., Ding, X.J., Zhang, Z.B., Bi, D.L., Cheng, Y.T., Chen, S., Li, X., and Zhang, Y.L.** (2009). Regulation of Cell Death and Innate Immunity by Two Receptor-like Kinases in Arabidopsis. *Cell Host Microbe* **6**, 34-44.
- Gimenez-Ibanez, S., Ntoukakis, V., and Rathjen, J.P.** (2009). The LysM receptor kinase CERK1 mediates bacterial perception in Arabidopsis. *Plant signaling & behavior* **4**, 539-541.
- Jirage, D., Tootle, T.L., Reuber, T.L., Frost, L.N., Feys, B.J., Parker, J.E., Ausubel, F.M., and Glazebrook, J.** (1999). Arabidopsis thaliana PAD4 encodes a lipase-like gene that is important for salicylic acid signaling. *Proceedings of the National Academy of Sciences* **96**, 13583-13588.
- Krol, E., Mentzel, T., Chinchilla, D., Boller, T., Felix, G., Kemmerling, B., Postel, S., Arents, M., Jeworutzki, E., Al-Rasheid, K.A., Becker, D., and Hedrich, R.** (2010). Perception of the Arabidopsis danger signal peptide 1 involves the pattern recognition receptor AtPEPR1 and its close homologue AtPEPR2. *The Journal of biological chemistry* **285**, 13471-13479.
- Leslie, M.E., Lewis, M.W., Youn, J.Y., Daniels, M.J., and Liljegren, S.J.** (2010). The EVERSHED receptor-like kinase modulates floral organ shedding in Arabidopsis. *Development* **137**, 467-476.
- Miya, A., Albert, P., Shinya, T., Desaki, Y., Ichimura, K., Shirasu, K., Narusaka, Y., Kawakami, N., Kaku, H., and Shibuya, N.** (2007). CERK1, a LysM receptor kinase, is essential for chitin elicitor signaling in Arabidopsis. *Proc Natl Acad Sci U S A* **104**, 19613-19618.
- Nekrasov, V., Li, J., Batoux, M., Roux, M., Chu, Z.H., Lacombe, S., Rougon, A., Bittel, P., Kiss-Papp, M., Chinchilla, D., van Esse, H.P., Jorda, L., Schwessinger, B., Nicaise, V., Thomma, B.P., Molina, A., Jones, J.D., and Zipfel, C.** (2009). Control of the pattern-recognition receptor EFR by an ER protein complex in plant immunity. *The EMBO journal* **28**, 3428-3438.
- Roux, M., Schwessinger, B., Albrecht, C., Chinchilla, D., Jones, A., Holton, N., Malinovsky, F.G., Tor, M., de Vries, S., and Zipfel, C.** (2011). The Arabidopsis leucine-rich repeat receptor-like kinases BAK1/SERK3 and BKK1/SERK4 are required for innate immunity to hemibiotrophic and biotrophic pathogens. *Plant Cell* **23**, 2440-2455.
- Schagger, H.** (2006). Tricine-SDS-PAGE. *Nat Protoc* **1**, 16-22.
- Schwessinger, B., Roux, M., Kadota, Y., Ntoukakis, V., Sklenar, J., Jones, A., and Zipfel, C.** (2011). Phosphorylation-dependent differential regulation of plant growth,

- cell death, and innate immunity by the regulatory receptor-like kinase BAK1. *PLoS Genet* **7**, e1002046.
- Shapiro, A.D., and Zhang, C.** (2001). The role of NDR1 in avirulence gene-directed signaling and control of programmed cell death in *Arabidopsis*. *Plant Physiol* **127**, 1089-1101.
- Shiu, S.H., and Blecker, A.B.** (2001). Receptor-like kinases from *Arabidopsis* form a monophyletic gene family related to animal receptor kinases. *Proceedings of the National Academy of Sciences of the United States of America* **98**, 10763-10768.
- Wang, G., Ellendorff, U., Kemp, B., Mansfield, J.W., Forsyth, A., Mitchell, K., Bastas, K., Liu, C.M., Woods-Tor, A., Zipfel, C., de Wit, P.J., Jones, J.D., Tor, M., and Thomma, B.P.** (2008). A genome-wide functional investigation into the roles of receptor-like proteins in *Arabidopsis*. *Plant Physiol* **147**, 503-517.
- Zipfel, C., Robatzek, S., Navarro, L., Oakeley, E.J., Jones, J.D., Felix, G., and Boller, T.** (2004). Bacterial disease resistance in *Arabidopsis* through flagellin perception. *Nature* **428**, 764-767.
- Zipfel, C., Kunze, G., Chinchilla, D., Caniard, A., Jones, J.D., Boller, T., and Felix, G.** (2006). Perception of the bacterial PAMP EF-Tu by the receptor EFR restricts *Agrobacterium*-mediated transformation. *Cell* **125**, 749-760.
